## Prevalence of silent atrial fibrillation in high-risk patients - preliminary results from a European three-country handheld ECG-screening study

Lund I.<sup>1</sup>; Engdahl J.<sup>2</sup>; Rosenqvist M.<sup>2</sup>; Puererfellner H.<sup>3</sup>; Sieghartsleitner S.<sup>3</sup>; Hendrikx T.<sup>4</sup>; Lillqvist J.<sup>4</sup>; Pervez Sheikh A.<sup>1</sup>; Bech Jensen J.<sup>1</sup>; Dixen U.<sup>1</sup>

<sup>1</sup>Hvidovre Hospital - Copenhagen University Hospital, Hvidovre, Denmark

<sup>2</sup>Karolinska Institutet, Department of Clinical Science, Stockholm, Sweden

<sup>3</sup>Ordensklinikum Linz Elisabethinen, Department of Cardiology, Linz, Austria

<sup>4</sup>Umea University Hospital, Family Medicine, Department of Public Health and Medicine, Umea, Sweden

**Funding Acknowledgements:** Type of funding sources: Private grant(s) and/or Sponsorship. Main funding source(s): Helsefonden Lilly and Herbert Hansens Foundation

**Introduction:** Patients with atrial fibrillation (AF) should in most cases be offered prophylactic anticoagulation treatment to prevent a stroke. However, the arrhythmia can appear without symptoms, so-called silent AF. Even without symptoms AF constitutes a risk for stroke.

**Purpose:** To screen high-risk patients with diabetes type 2 (DMII) or heart failure (CHF) for silent AF.

**Methods:** We included patients > 64 years with either DMII or CHF from out-patient clinics and local health centers. Exclusion criteria were known AF, anticoagulation treatment, recent stroke, or an implanted pacemaker or ICD. Patients were recruited from a total of eleven study centers in three countries. All underwent 14-days of intermittent ECG screening with a handheld ECG recording four times each day; the recordings were digitally stored. AF was diagnosed in cases of irregular heart rhythm and absence of P waves on at least one recording (thirty seconds) or on at least two recordings for a minimum of ten seconds.

**Results:** In total, 813 patients were included, 541 of these with DMII. The mean age was 73,4 years  $\pm$  5,8 SD, 40,7% of the patients were female.

In the DMII group thirteen patients (2.4%) were diagnosed with silent AF and offered anticoagulation. In the CHF group six (2.2%) patients had diagnosed silent AF on the handheld ECG. The prevalence of AF increased with increasing age, see Table 1. Thus, in the youngest group AF was diagnosed in 1.3% of the patients compared to 3.9 % in the age group 75 years or older.

**Conclusions:** Screening for silent AF in high-risk patients with DMII or CHF seems worthwhile, especially in patients 75 years or older.

Abstract Figure. ECG with atrial fibrillation

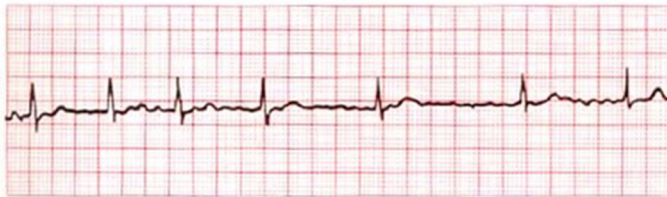

II

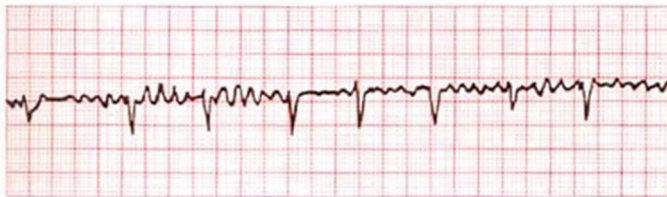

V1
